# Supplementary material for: QServer: A Biclustering Server for Prediction and Assessment of Co-Expressed Gene Clusters
Source: PubMed Central journal article supplement (PMC3293860; doi:10.1371/journal.pone.0032660), 2012-03-05
Supplement: pone.0032660.s004.pdf [file pone.0032660.s004.pdf]

**Table S1: Detailed information of the versions and release dates of the data source on QServer.**

| Species                     | Genome sequences | GI       | locus   | refseq   | uniport | GO      | IPR     | probe_ID                                    | TAIR    |
|-----------------------------|------------------|----------|---------|----------|---------|---------|---------|---------------------------------------------|---------|
| Bucillus subtilis           | 8/24/09          | 8/24/09  | 8/24/09 | 8/24/09  | 9/21/09 | 8/29/09 | 8/29/09 |                                             |         |
| Escherichia coli K12 MG1655 | 8/24/09          | 8/24/09  | 8/24/09 | 8/24/09  | 9/21/09 | 8/29/09 | 8/29/09 | v4_Build_5                                  |         |
| Arabidopsis thaliana        | 11/12/07         | 11/12/07 | 9/22/09 | 11/12/07 | 9/21/09 | 8/29/09 | 8/29/09 | 10/13/05                                    | 6/20/09 |
| Mus musculus                | 6/12/09          | 6/12/09  | 6/12/09 | 6/12/09  | 9/21/09 | 8/29/09 | 8/29/09 |                                             |         |
| Homo sapiens                | 10/7/08          | 10/7/08  | 10/7/08 | 10/7/08  | 9/21/09 | 8/29/09 | 8/29/09 | U133A: 04/28/09;<br>U133_plus2:<br>06/30/09 |         |
