# Supplementary material for: QServer: A Biclustering Server for Prediction and Assessment of Co-Expressed Gene Clusters
Source: PubMed Central journal article supplement (PMC3293860; doi:10.1371/journal.pone.0032660), 2012-03-05
Supplement: pone.0032660.s005.pdf [file pone.0032660.s005.pdf]

## Table S2: Example gene list (containing 211 genes)

b3128, b1283, b1923, b2060, b1944, b1076, b2148, b0695, b1725, b1885, b3158, b1904, b2728, b3117, b3365, b1946, b2423, b4380, b2752, b3605, b1080, b4154, b1072, b1044, b2150, b1887, b2208, b1881, b3573, b2207, b2744, b4069, b3525, b2486, b3544, b2997, b0894, b1883, b3225, b2770, b0307, b3223, b2750, b4067, b4034, b0999, b2431, b2059, b1566, b2980, b0306, b1891, b3999, b1889, b3543, b3020, b3126, b2434, b2126, b1415, b3479, b0241, b3124, b4123, b4032, b3125, b0512, b4151, b2424, b0297, b2343, b1391, b1987, b1941, b1498, b1010, b2746, b1297, b0720, b3072, b2406, b0953, b1922, b2514, b4070, b3342, b1938, b1884, b2359, b1879, b2976, b3540, b2957, b2643, b4036, b1661, b1948, b0422, b1256, b1224, b2788, b2727, b4379, b1926, b1074, b2960, b1940, b1079, b0549, b3159, b0346, b4153, b1895, b2751, b2762, b1945, b1724, b3846, b1943, b1949, b1083, b2844, b0598, b0550, b0042, b2358, b1924, b1921, b1892, b2726, b1886, b0487, b2414, b3127, b3221, b1075, b2206, b1326, b4207, b3604, b4068, b1757, b2202, b2365, b2458, b1081, b2149, b1071, b1077, b4261, b1937, b4109, b2764, b3476, b1880, b3416, b0331, b0621, b1882, b1942, b4071, b3603, b3222, b2383, b1078, b1888, b4355, b3845, b2745, b1890, b0587, b1939, b3224, b2425, b2310, b1070, b1925, b0651, b3366, b4033, b1194, b1082, b1878, b1950, b4035, b3296, b3478, b1223, b0904, b4152, b4037, b4557, b2729, b2662, b1073, b2108, b2342, b2012, b0895, b2659, b3092, b1218, b1000, b2579, b2537, b4122, b1947, b4021, b2341, b3541, b2463
